# Supplementary material for: Enzymes Catalyzing the TCA- and Urea Cycle Influence the Matrix Composition of Biofilms Formed by Methicillin-Resistant Staphylococcus aureus USA300
Source: PubMed Central journal article supplement (PMC6313315; doi:10.3390/microorganisms6040113), 2018-10-29
Supplement: microorganisms-06-00113-s001.pdf [file microorganisms-06-00113-s001.pdf]

## Supplementary Materials:

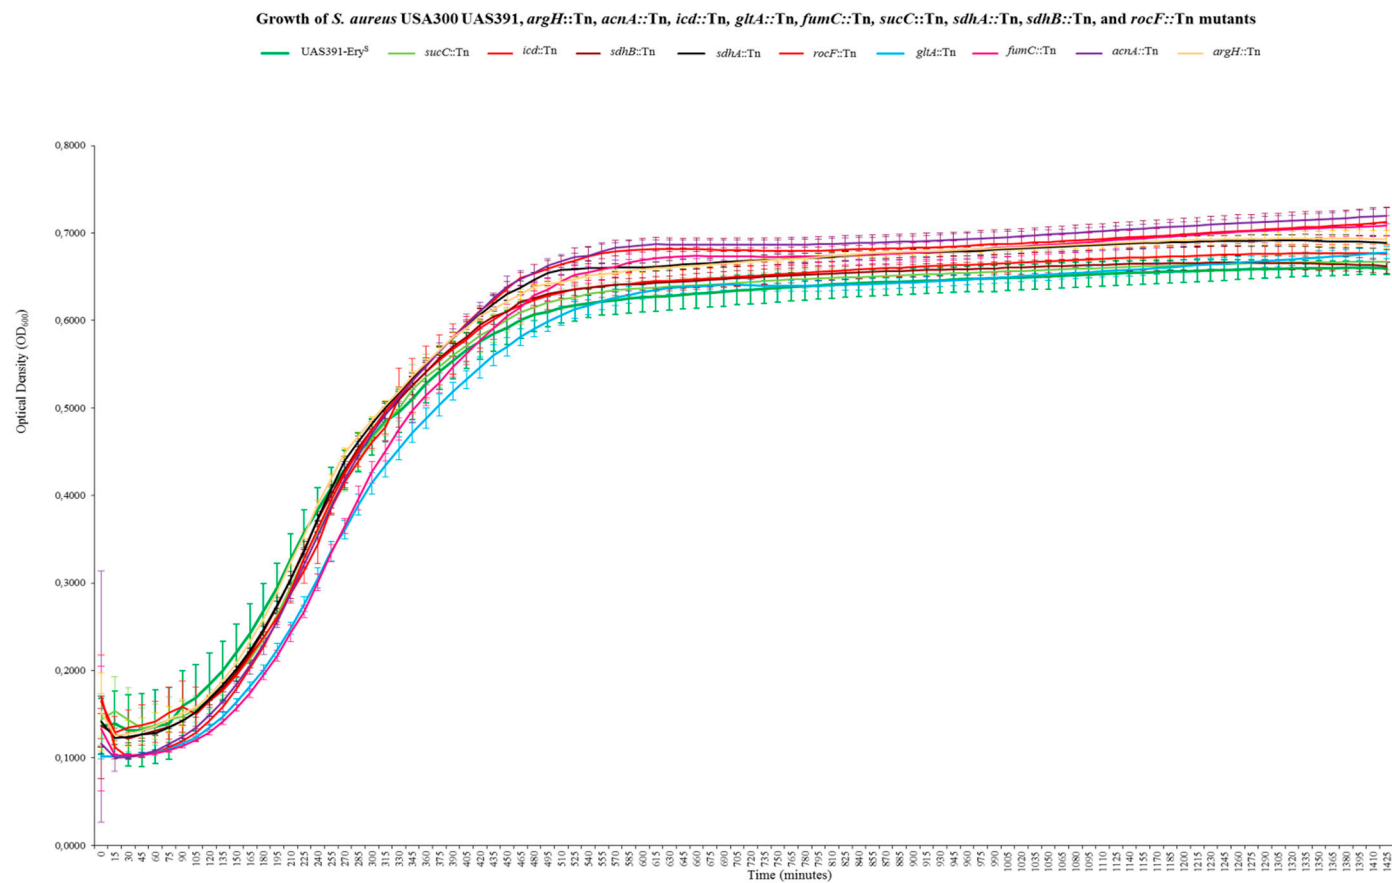

**Supplementary Figure S1:** Background absorption-corrected 24 h growth curves for UAS391-Ery<sup>S</sup> as well as *argH::Tn*, *acnA::Tn*, *icd::Tn*, *gltA::Tn*, *fumC::Tn*, *sucC::Tn*, *sdhA::Tn*, *sdhB::Tn* and *rocF::Tn* mutants. Error bars in corresponding color represent the 95% confidence interval per strain.

**Transcription levels of *S. aureus* USA300 UAS391 *argH*::Tn, *acnA*::Tn, *icd*::Tn, *gltA*::Tn, *fumC*::Tn, *sucC*::Tn, *sdhA*::Tn, *sdhB*::Tn, and *rocF*::Tn mutants**

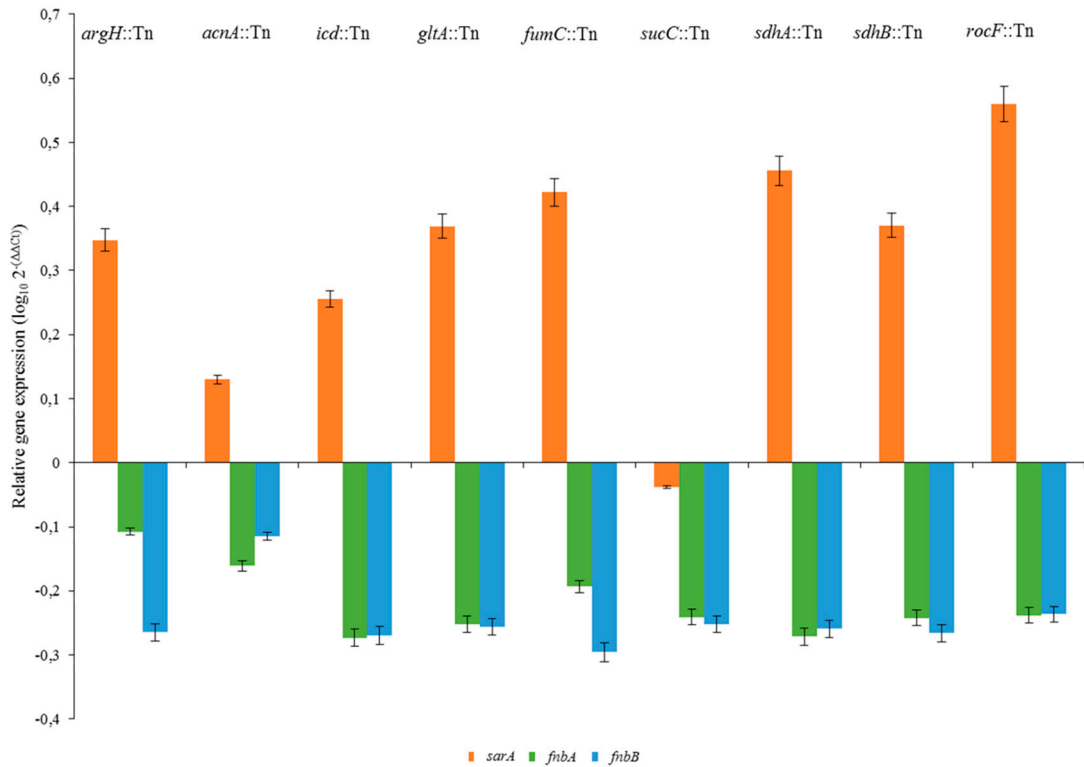

**Supplementary Figure S2:** Relative quantification of *fnbA*, *fnbB* and *sarA* gene expression in UAS391-Ery<sup>S</sup> and the corresponding TCA- and urea cycle knockout mutants, normalized to *gyrB* expression and calculated using the Comparative C<sub>t</sub> Method (2<sup>-ΔΔCt</sup>). Gene expression in UAS391-Ery<sup>S</sup> was taken as baseline 0.

**Supplementary Table S1:** Primers used during this study. Primers were designed against *S. aureus* strain USA300-UAS391 (#CP007690.1).

| Gene name                          | ID       | Sequence (5'→3')         | Product size (bp) | Reference  |
|------------------------------------|----------|--------------------------|-------------------|------------|
| <i>Primers for RT-PCR</i>          |          |                          |                   |            |
| <i>gyrB</i>                        | GyrB-F   | GTAACACGTCGTAAATCAGCG    | 170               | [32]       |
|                                    | GyrB-R   | CGTAATGGTAAAATCGCCTGC    |                   |            |
| <i>fnbB</i>                        | RTFnbB-F | AGGTGCAGAAGGTCATGCAG     | 222               | This study |
|                                    | RTFnbB-R | TGATCGCTAACAGCACCAGT     |                   |            |
| <i>fnbA</i>                        | RTFnbA-F | CCAGTACCACCTGCCAAAGA     | 195               |            |
|                                    | RTFnbA-R | TCCGCCGAACAACATACCTT     |                   |            |
| <i>sarA</i>                        | RTSarA-F | GCTGTATTGACATACATCAGCGA  | 250               |            |
|                                    | RTSarA-R | CGTTGTTTGCTTCAGTGATTCG   |                   |            |
| <i>Primers for complementation</i> |          |                          |                   |            |
| pALC2073 plasmid                   | TetR-2   | CAATGTAGGCTGCTCTACACCTAG | 547               | [17]       |
|                                    | pALC-2   | GATCGGTGCGGGCCTCTTCGCTAT |                   |            |

|             |        |                                                                              |                                                        |            |
|-------------|--------|------------------------------------------------------------------------------|--------------------------------------------------------|------------|
| <i>argH</i> | ArgH-1 | AGCTTGATGGTACCGAGCTCGAATTTGGAGGCTATAG<br>CAATGAGCAATA                        | 1807                                                   | This study |
|             | ArgH-2 | GTTGTA AACGACGGCCAGTGAATTCCTATTGTGATA<br>GTAATTGTTTAGCAAC                    |                                                        |            |
| <i>acnA</i> | AcnA-1 | AGCTTGATGGTACCGAGCTCGAATTATGTATCAAGGG<br>GGATCATTAAATGGCTGCAAATTTAAAGAGCAATC | 3141                                                   |            |
|             | AcnA-2 | GTTGTA AACGACGGCCAGTGAATTCCTATTGCGCTA<br>ATTATTCTTAAAACCATTTG                |                                                        |            |
| <i>gltA</i> | GltA-1 | AGCTTGATGGTACCGAGCTCGAATTTAAAGGGGAAAT<br>TTATCATGGCAGAATTACAAAGAG            | GltA-1 + GltA-2:<br>1522                               |            |
|             | GltA-2 | GTTGTA AACGACGGCCAGTGAATTCCTATTTCTTTC<br>TTCAAGCGGGATATA                     | GltA-1 + Icd-2:<br>2869                                |            |
| <i>icd</i>  | Icd-1  | AGCTTGATGGTACCGAGCTCGAATTTGGAGGTAAAA<br>TAACTATGACTGCAGAAAAAATTAC            | Icd-1 + Icd-2:<br>1699                                 |            |
|             | Icd-2  | GTTGTA AACGACGGCCAGTGAATTCCTATTTAAATT<br>TTAATCAATTCATC                      | GltA-1 + Icd-2:<br>2869                                |            |
| <i>rocF</i> | RocF-1 | AGCTTGATGGTACCGAGCTCGAATTTAGAGCAAAGGG<br>GGACGCTTATGACAAAGACAAAAG            | 1342                                                   |            |
|             | RocF-2 | GTTGTA AACGACGGCCAGTGAATTCCTATAATAAAG<br>TTTCACCAAAAAATGTTCCAAC              |                                                        |            |
| <i>fumC</i> | FumC-1 | AGCTTGATGGTACCGAGCTCGAATTAACAGTGATAAG<br>GGGAGAAATTGAATGTCAGTAAGAATTGAAC     | 1823                                                   |            |
|             | FumC-2 | GTTGTA AACGACGGCCAGTGAATTCCTAATGAGGAT<br>CTACCATATCTTCTG                     |                                                        |            |
| <i>sdhA</i> | SdhA-1 | AGCTTGATGGTACCGAGCTCGAATT<br>AGGGGAGTGAAATTTTATGGCAGAGAAACATC                | SdhA-1 + SdhA-<br>2: 2197                              |            |
|             | SdhA-2 | GTTGTA AACGACGGCCAGTGAATTCCTATTTTACC<br>CCCTTAGACTTAC                        | SdhA-1 + SdhB-<br>2: 3012                              |            |
| <i>sdhB</i> | SdhB-1 | AGCTTGATGGTACCGAGCTCGAATTCTAAAGGGGGTA<br>AAAAATAATGACTGAACAATCAGTG           | SdhB-1 + SdhB-<br>2: 1254                              |            |
|             | SdhB-2 | GTTGTA AACGACGGCCAGTGAATTCCTATTCTACTTC<br>ATGGTCTGAACCAAAG                   | SdhA-1 + SdhB-<br>2: 3012                              |            |
| <i>sucC</i> | SucC-1 | AGCTTGATGGTACCGAGCTCGAATTAACCTAAGTAAC<br>AGGAGGATGGAAGATGAATATCCACGAGTATC    | SucC-1 + SucC-<br>2: 1605<br>SucC-1 + SucC-<br>3: 2595 |            |
|             | SucC-2 | GTTGTA AACGACGGCCAGTGAATTCCTATGCTTCTTT<br>GACTAGTTTAAAC                      |                                                        |            |
|             | SucC-3 | GTTGTA AACGACGGCCAGTGAATTCCTATTTATTAAC<br>AGTTAATAATGATTC                    |                                                        |            |

32. Sihto, H.M.; Tasara, T.; Stephan, R.; Johler, S. Validation of reference genes for normalization of qPCR mRNA expression levels in *Staphylococcus aureus* exposed to osmotic and lactic acid stress conditions encountered during food production and preservation. *FEMS Microbiol. Lett.* **2014**, *356*, 134–140, doi:10.1111/1574-6968.12491.
